# Supplementary material for: Controlling the morphology and composition of Ag/AgBr hybrid nanostructures and enhancing their visible light induced photocatalytic properties
Source: Royal Society of Chemistry journal article supplement (doi:10.1039/c6ra08682a), 2016-01-01
Supplement: c6ra08682a1.pdf [file c6ra08682a1.pdf]

## Supporting Information

### Controlling the Morphology and Composition of Ag/AgBr Hybrid Nanostructures and Enhancing Their Visible Light Induced Photocatalytic Properties

Aasim Shahzad, Taekyung Yu\*, and Woo-Sik Kim\*

*Department of Chemical Engineering, College of Engineering, Kyung Hee University, Youngin, 446-701, Korea*

*\*Corresponding author. E-mail: tkyu@khu.ac.kr (T. Yu) and wskim@khu.ac.kr (W.-S. Kim)*

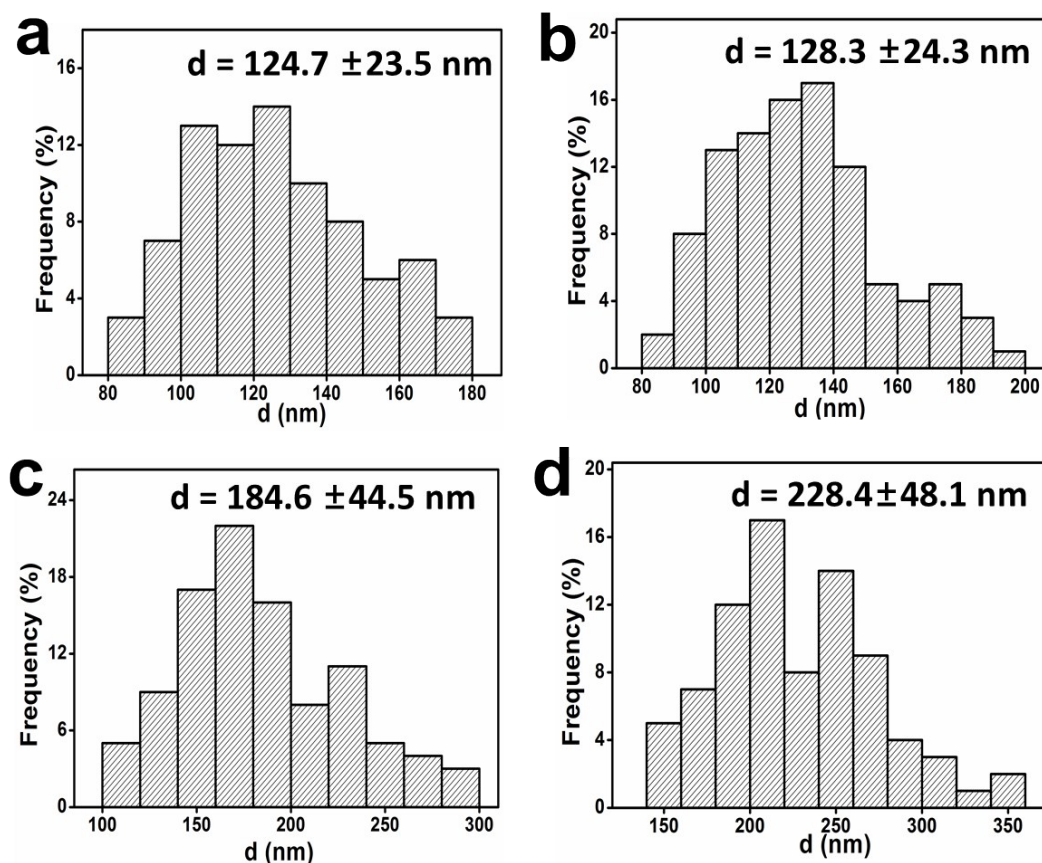

**Fig. S1.** Particle size distributions of the AgBr nanoparticles synthesized at various reaction temperatures shown in Fig. 2a–d. The reaction temperature was (a) 30 °C, (b) 50 °C, (c) 70 °C, and (d) 90 °C, respectively.

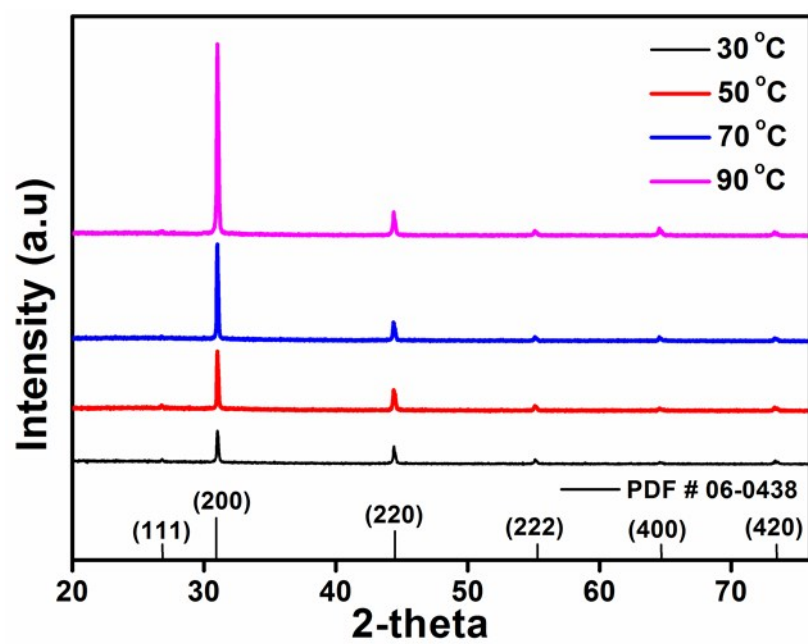

**Fig. S2.** XRD pattern of AgBr nanoparticles synthesized at various reaction temperatures shown in Fig. 2a–d.

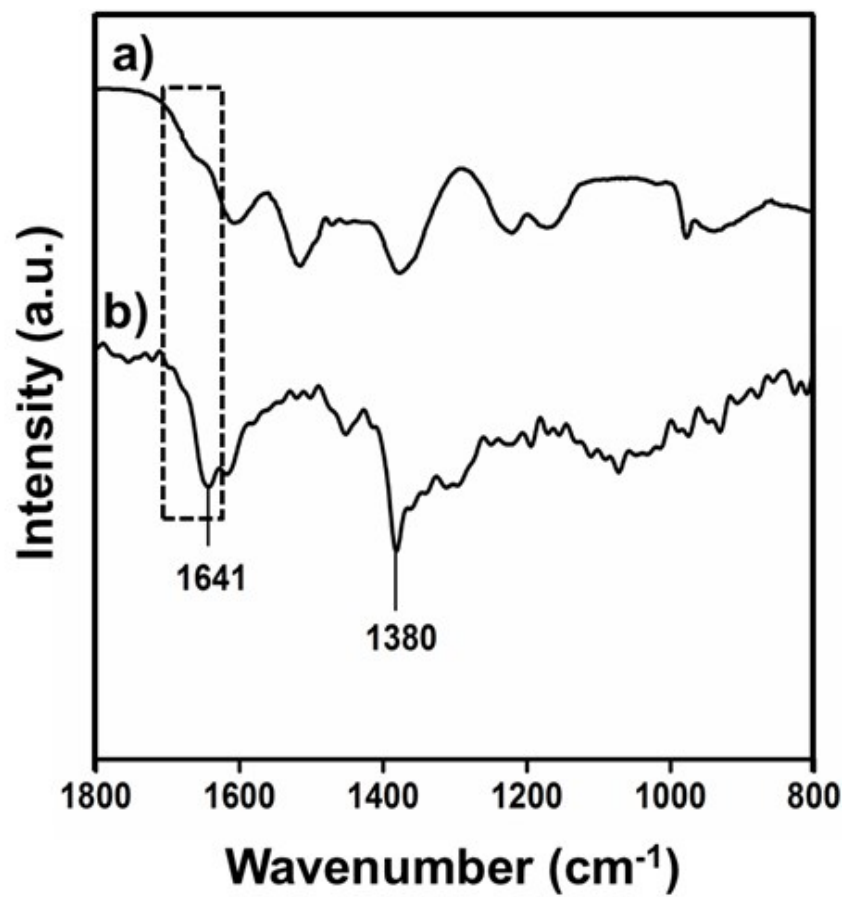

**Fig. S3.** FTIR spectra of (a) PEI, and (b) PEI-stabilized AgBr nanoparticles: samples prepared under same conditions as shown in Fig. 2b

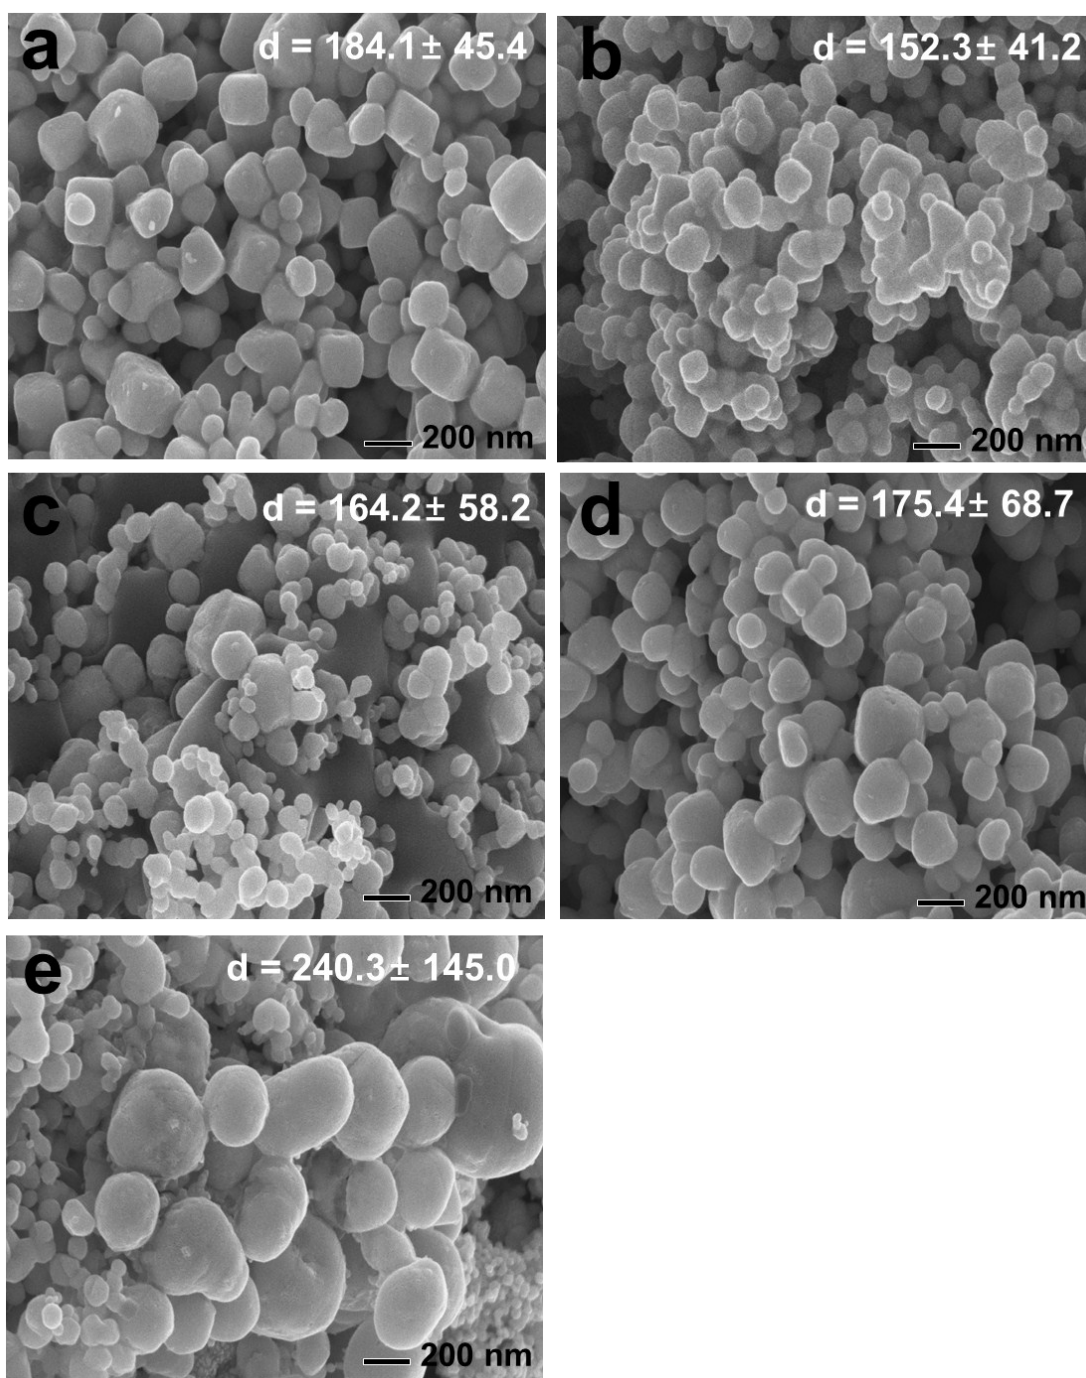

**Fig. S4.** (a-e) SEM images of AgBr nanoparticles prepared under the same conditions as those in Fig. 2b, except that the synthesis was conducted at various concentrations of  $\text{AgNO}_3$ . The concentration was (a) 0.1 M, (b) 1.0 M, (c) 1.5 M, (d) 2.0 M, and (e) 2.5 M.

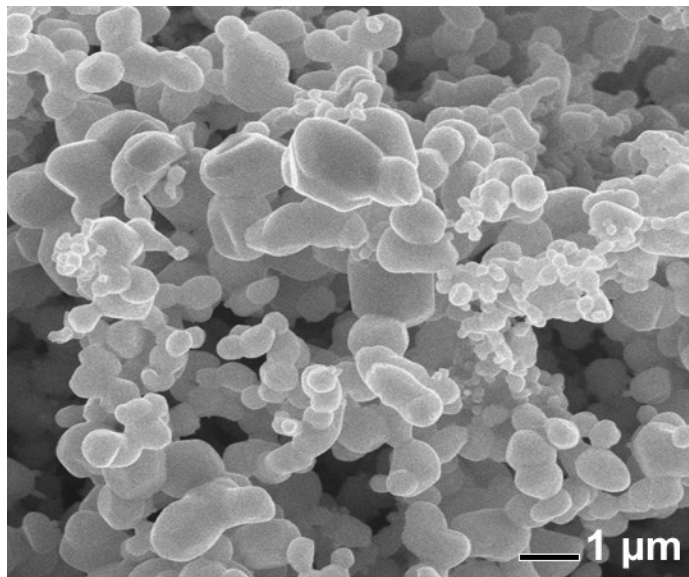

**Fig. S5.** SEM image of AgBr nanoparticles prepared under the same conditions as those in Fig. 2b, except that the synthesis was conducted in the absence of PEI.

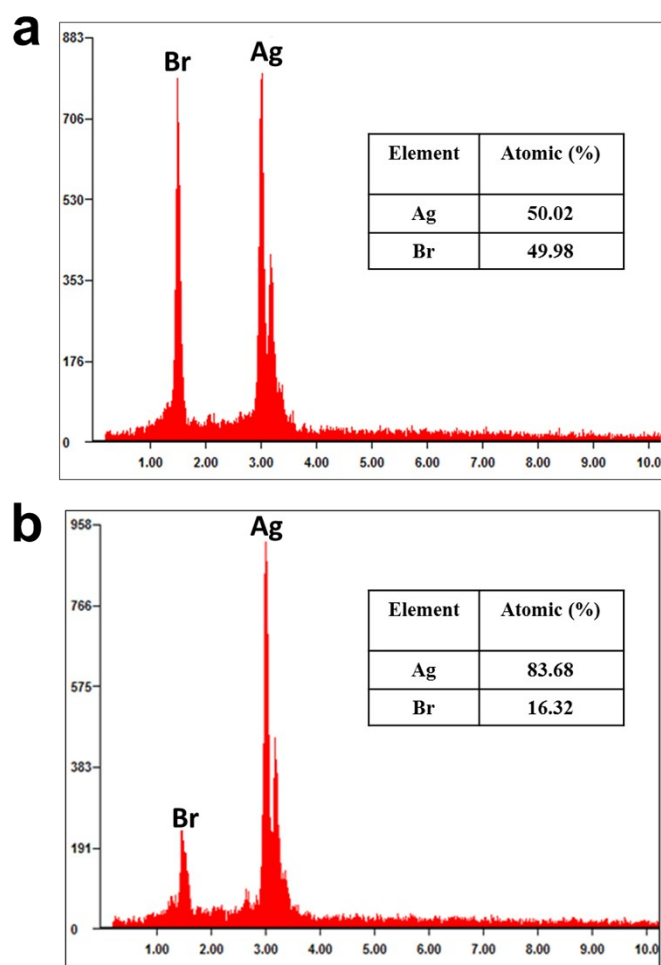

**Fig. S6.** EDS spectrum of the AgBr and Ag/AgBr-2 as shown in Fig. 2b and Fig. 3f, respectively.

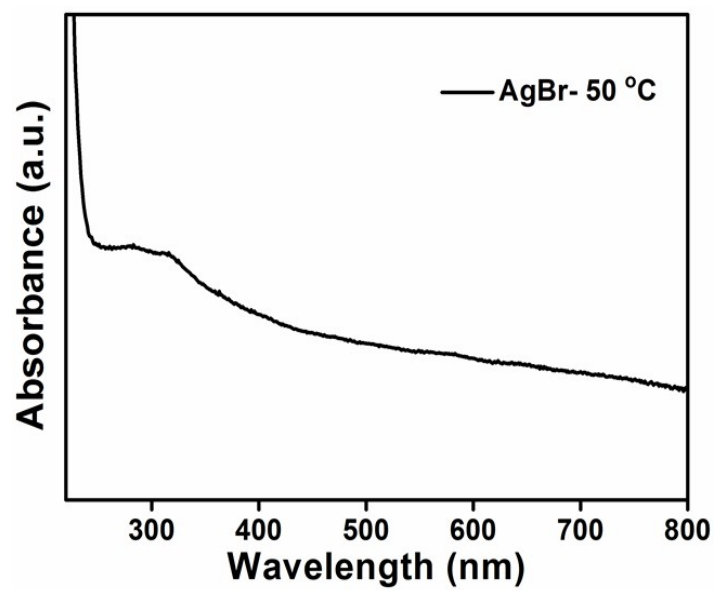

**Fig. S7.** UV-Vis spectrum of the AgBr nanoparticles prepared at 50 °C shown in Fig. 2b.

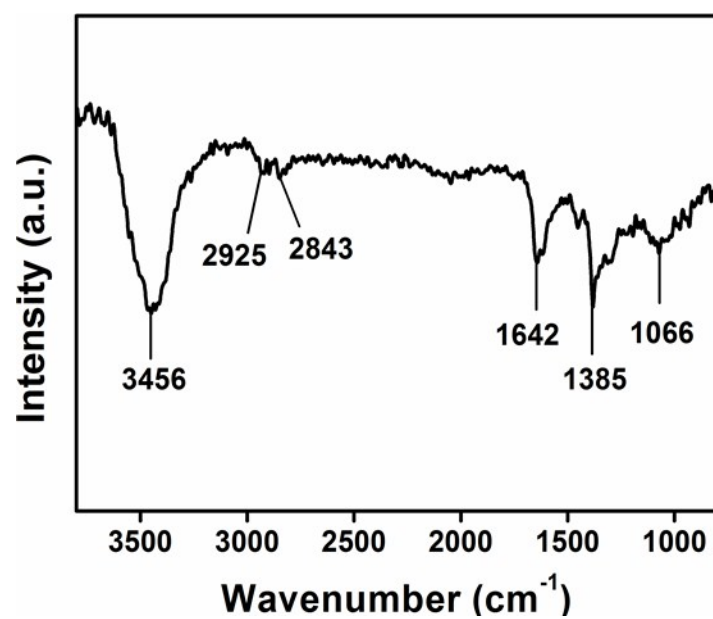

**Fig. S8.** FT-IR spectrum of the Ag/AgBr hybrid nanostructures shown in Fig. 3f.



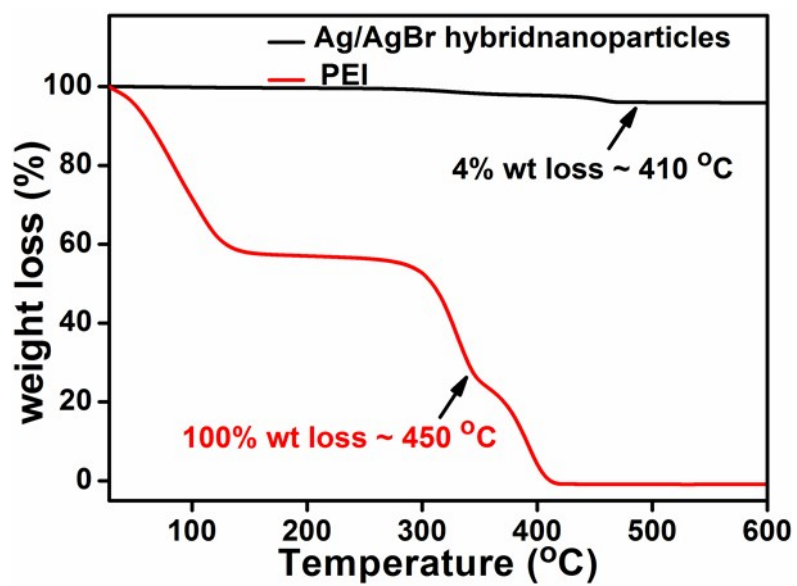

**Fig. S9.** TGA thermogram of the Ag/AgBr hybrid nanostructures shown in Fig. 3f.
